# Supplementary material for: Genetic Evaluation of the Patients with Clinically Diagnosed Inborn Errors of Immunity by Whole Exome Sequencing: Results from a Specialized Research Center for Immunodeficiency in Türkiye
Source: PubMed Central journal article supplement (PMC11219406; doi:10.1007/s10875-024-01759-w), 2024-07-02

**Genetic evaluation of the patients with clinically diagnosed inborn errors of immunity by whole exome sequencing: Results from a specialized research center for immunodeficiency in Türkiye**

**Journal of Clinical Immunology**

Baran Erman<sup>1,2</sup>, Umran Aba<sup>2,3</sup>, Canberk Ipsir<sup>2,3</sup>, Damla Pehlivan<sup>2</sup>, Caner Aytekin<sup>4</sup>, Gökhan Cildir<sup>5</sup>, Begum Cicek<sup>1</sup>, Ceren Bozkurt<sup>2</sup>, Sidem Tekeoğlu<sup>2</sup>, Melisa Kaya<sup>2</sup>, Ciğdem Aydoğmus<sup>6</sup>, Funda Cipe<sup>7</sup>, Gülsan Sucak<sup>8</sup>, Sevgi Bilgic Eltan<sup>9</sup>, Ahmet Özen<sup>9</sup>, Safa Barış<sup>9</sup>, Elif Karakoç-Aydiner<sup>9</sup>, Ayca Kıyıkım<sup>10</sup>, Betül Karaatmaca<sup>11</sup>, Hulya Kose<sup>12</sup>, Dilara Fatma Kocacık Uygun<sup>13</sup>, Fatih Çelmeli<sup>14</sup>, Tuğba Arıkoğlu<sup>15</sup>, Dilek Özcan<sup>16</sup>, Özlem Keskin<sup>17</sup>, Elif Arık<sup>17</sup>, Elif Soyak Aytekin<sup>18</sup>, Mahmut Cesur<sup>17</sup>, Ercan Küçükosmanoğlu<sup>17</sup>, Mehmet Kılıç<sup>19</sup>, Mutlu Yüksek<sup>20</sup>, Zafer Bıçakçı<sup>21</sup>, Saliha Esenboğa<sup>22</sup>, Deniz Çağdaş Ayvaz<sup>22,23</sup>, Asena Pınar Sefer<sup>24</sup>, Sükrü Nail Güner<sup>25</sup>, Sevgi Keleş<sup>25</sup>, İsmail Reisli<sup>25</sup>, Uğur Muşabak<sup>26</sup>, Nazlı Deveci Demirbas<sup>27</sup>, Şule Haskoloğlu<sup>27</sup>, Sara Sebnem Kılıç<sup>28,29</sup>, Ayşe Metin<sup>11</sup>, Figen Doğu<sup>27</sup>, Aydan İkinciogulları<sup>27\*</sup>, İlhan Tezcan<sup>30\*</sup>

<sup>1</sup> Institute of Child Health, Hacettepe University, Ankara, Türkiye

<sup>2</sup> Can Sucak Research Laboratory for Translational Immunology, Hacettepe University, Ankara, Türkiye

<sup>3</sup> Department of Pediatric Immunology, Institute of Child Health, Hacettepe University, Ankara, Türkiye

<sup>4</sup> Pediatric Immunology, SBU Ankara Dr Sami Ulus Maternity Child Health and Diseases Training and Research Hospital, Ankara, Türkiye

<sup>5</sup> Centre for Cancer Biology, SA Pathology and the University of South Australia, Adelaide, SA 5000, Australia

<sup>6</sup> Department of Pediatric Allergy and Clinical Immunology, University of Health Sciences, Istanbul Basaksehir Cam and Sakura City Hospital, Istanbul, Türkiye

<sup>7</sup> Department of Pediatric Allergy and Clinical Immunology, Altinbas University School of Medicine, Istanbul, Türkiye

<sup>8</sup> Medical Park Bahçeşehir Hospital, Clinic of Hematology and Transplantation, İstanbul, Türkiye

<sup>9</sup> Marmara University, Faculty of Medicine, Department of Pediatric Allergy and Immunology, Jeffrey Modell Diagnostic and Research Center for Primary Immunodeficiencies, The Isil Berat Barlan Center for Translational Medicine, Istanbul, Türkiye

<sup>10</sup> Pediatric Allergy and Immunology, Cerrahpasa School of Medicine, Istanbul University-Cerrahpasa, Istanbul, Türkiye

<sup>11</sup> Department of Pediatric Allergy and Immunology, University of Health Sciences, Ankara Bilkent City Hospital, Ankara, Türkiye

<sup>12</sup> Department of Pediatric Immunology, Diyarbakir Children Hospital, Diyarbakir, Türkiye

<sup>13</sup> Division of Allergy Immunology, Department of Pediatrics, Akdeniz University Faculty of Medicine, Antalya, Türkiye

<sup>14</sup> Republic of Türkiye Ministry of Health Antalya Training and Research Hospital Pediatric Immunology and Allergy Diseases, Antalya, Türkiye

<sup>15</sup> Department of Pediatric Allergy and Immunology, Faculty of Medicine, Mersin University, Mersin, Türkiye

<sup>16</sup> Division of Pediatric Allergy and Immunology, Faculty of Medicine, Balcali Hospital, Cukurova University, Adana, Türkiye

<sup>17</sup> Department of Pediatric Allergy and Immunology, Faculty of Medicine, Gaziantep University, Gaziantep, Türkiye

<sup>18</sup> Department of Pediatric Allergy and Immunology, Etlik City Hospital, Ankara, Türkiye

<sup>19</sup> Division of Allergy and Immunology, Department of Pediatrics, Faculty of Medicine, University of Firat, Elazığ, Türkiye

<sup>20</sup> Department of Pediatric Immunology and Allergy, Faculty of Medicine, Zonguldak Bulent Ecevit University, Zonguldak, Türkiye

<sup>21</sup> Department of Pediatric Hematology, Faculty of Medicine, Ataturk University, Türkiye

<sup>22</sup> Hacettepe University School of Medicine, Department of Pediatrics, Division of Pediatric Immunology, Ankara, Türkiye

<sup>23</sup> Section of Pediatric Immunology, Institute of Child Health, Hacettepe University, Ankara, Türkiye

<sup>24</sup> Department of Pediatric Allergy and Immunology, Şanlıurfa Training and Research Hospital, Şanlıurfa, Türkiye

<sup>25</sup> Department of Pediatric Immunology and Allergy, Medicine Faculty, Necmettin Erbakan University, Konya, Türkiye

<sup>26</sup> Department of Immunology and Allergy, Baskent University School of Medicine, Ankara, Ankara, Türkiye

<sup>27</sup> Department of Pediatric Immunology and Allergy, Ankara University Faculty of Medicine, Ankara, Türkiye

<sup>28</sup> Division of Pediatric Immunology-Rheumatology, Bursa Uludag University Faculty of Medicine, Bursa, Türkiye

<sup>29</sup> Translational Medicine, Bursa Uludag University, Translational Medicine, Bursa, Türkiye

<sup>30</sup> Hacettepe University School of Medicine, Department of Pediatrics, Division of Pediatric Immunology, Ankara, Türkiye

\*These authors contributed equally to this work

**Correspondence:** Baran Erman, [baranerman@gmail.com](mailto:baranerman@gmail.com)

**Keywords:** Inborn errors of immunity, next generation sequencing, whole exome sequencing, genetic diagnosis

## Supplementary Tables:

### Supplementary Table 1. Pathogenicity of the variants

| Patient no | Gene             | Variant                                       | ACMG-based pathogenicity | Evidence Code      | CADD         | Polyphen | Gnomad* | Turkish variome [1]# |
|------------|------------------|-----------------------------------------------|--------------------------|--------------------|--------------|----------|---------|----------------------|
| P1         | <i>CARD9</i>     | c.883C>T p.Gln295Ter                          | P                        | PVS1 PP5           | 41           | -        | 0       | 0.0001783            |
| P2         | <i>RFXANK</i>    | c.634C>T p.Arg212Ter                          | P                        | PP5 PVS1 PM2       | 39           | -        | 0       | 0.0003643            |
| P3         | <i>CD3E</i>      | c.176G>A p.Trp59Ter                           | P                        | PP5 PVS1 PM2       | 35           | -        | 0       |                      |
| P4         | <i>NFATC2</i>    | c.340_345delGAGATC<br>p.Glu114_Ile115del      | VUS                      | PM2                | 21           | -        | 0       |                      |
| P5         | <i>JAK3</i>      | c.2134G>A p.Gly712Ser                         | VUS                      | PM2                | 25.7         | PD       | 0       |                      |
| P6         | <i>RAG2</i>      | c.581C>A p.Ser194Ter                          | P/LP                     | PP5 PVS1 PM2       | 36           | -        | 0       |                      |
| P7         | <i>RAG1</i>      | c.2005G>Ap.Glu669Lys<br>c.1307C>A p.Thr436Asn | P/LP<br>VUS              | PP5 PM2<br>PM2 BP4 | 28.2<br>23.8 | D<br>D   | 0<br>0  |                      |
| P8         | <i>RAG1</i>      | c.2005G>Ap.Glu669Lys<br>c.1307C>A p.Thr436Asn | VUS<br>VUS               | PM2 BP4<br>PM2 BP4 | 24.1<br>28.2 | D<br>D   | 0<br>0  |                      |
| P9         | <i>CD70</i>      | c.332C>T p.Thr111Met                          | P/LP                     | PP5 PM2            | 25.3         | D        | 0       |                      |
| P10        | <i>CD70</i>      | c.332C>T p.Thr111Met                          | P/LP                     | PP5 PM2            | 25.3         | D        | 0       |                      |
| P11        | <i>CYBA</i>      | c.58+4_58+7delAGTG                            | LP                       | PP5                | -            | -        | 0       |                      |
| P12        | <i>ZNF341</i>    | c.1626C>G p.Tyr542Ter                         | P                        | PP5 PVS1 PM2       | 36           | -        | 0       |                      |
| P13        | <i>ZAP70</i>     | c.1010T>G p.Leu337Ala                         | P                        | PP5 PM2            | 28.4         | D        | 0       |                      |
| P14        | <i>RAG2</i>      | c.105G>C p.Gly35Ala                           | P                        | PP5 PM2            | 24.4         | D        | 0       |                      |
| P15        | <i>RAG2</i>      | c.105G>C p.Gly35Ala                           | P                        | PP5 PM2            | 24.4         | D        | 0       |                      |
| P16        | <i>TNFRSF13B</i> | c.310C>T p.Cys104Arg                          | LP                       | PP5 PM2            | 25.8         | D        | 0       | 0.003123141          |
| P17        | <i>PIK3R1</i>    | c.837-1G>A                                    | VUS                      | PM2                | -            | -        | 0       |                      |
| P18        | <i>PGM3</i>      | c.214G>A p.Gly72Ser                           | LP                       | PP5 PM2            | 29.9         | D        | 0       |                      |
| P19        | <i>SAMD9L</i>    | c.2639A>C p.His880Pro                         | VUS                      | PM2                | 24.2         | B        | 0       |                      |
| P20 5      | <i>TNFRSF13B</i> | c.204dupA p.Leu69Tfs*11                       | P                        | PP5 PVS1           | 22.8         | -        | 1       |                      |
| P21        | <i>CD79A</i>     | c.380-2A>G                                    | VUS                      |                    | -            | -        | 0       |                      |
| P22        | <i>DNMT3B</i>    | c.2029G>A p.Val677Met                         | LP                       | PP5 PM2            | 27.2         | D        | 0       |                      |
| P23        | <i>AICDA</i>     | c.A100T p.Lys34Ter                            | P                        | PVS1 PP5           | 37           | -        | 0       |                      |
| P24        | <i>CYBA</i>      | c.G70A p.Gly24Arg                             | P/LP                     | PP5 PM2            | 26.4         | D        | 0       |                      |
| P25        | <i>MALTI</i>     | c.1318_1321delTGTC<br>p.L440Valfs*6           | VUS                      | PM2                | -            | -        | 0       |                      |
| P26        | <i>SBDS</i>      | c.578T>C p.Lys193Pro                          | VUS                      | PM2                | 45           | PD       | 0       |                      |

|     |                 |                                          |     |              |      |    |   |             |
|-----|-----------------|------------------------------------------|-----|--------------|------|----|---|-------------|
|     |                 | c.184A>T p.Lys62Ter                      | VUS | PM2          | 28.1 | PD | 0 |             |
| P27 | <i>RFXANK</i>   | Exon 2-6 Deletion                        | VUS | PM2          | -    | -  | 0 |             |
| P28 | <i>MAGT1</i>    | c.199-16A>G                              | VUS | PM2          | -    | -  | 0 |             |
| P29 | <i>ADA</i>      | c.551_555del<br>p.Glu184Glyfs*2          | LP  | PVS1 PM2     | -    | -  | 0 |             |
|     |                 | c.241G>A p.Gly81Arg                      | VUS | PM2          | 22.1 | -  | 0 |             |
| P30 | <i>RAG1</i>     | c.1767C>G p.Tyr589Ter                    | LP  | PVS1 PM2     | 32   | -  | 0 | 0.000297619 |
| P31 | <i>JAK3</i>     | c.932delC<br>p.Pro311Argfs*17            | LP  | PVS1 PM2     | -    | -  | 0 |             |
| P32 | <i>TRAF3IP2</i> | c.559C>T p.Arg187Ter                     | LP  | PVS1 PM2     | 36   | -  | 0 |             |
| P33 | <i>RAG1</i>     | c.2126G>A p.Gly709Asp                    | VUS | PM2          | 23.9 | D  | 0 |             |
| P34 | <i>ADA</i>      | c.779A>G p.Glu260Gly                     | LP  | PM2 PP3      | 28.5 | D  | - |             |
| P35 | <i>NCF2</i>     | c.233G>A p.Gly78Glu                      | LP  | PM2 PP3      | 25.7 | D  | 0 |             |
| P36 | <i>CYBA</i>     | c.166dupC<br>p.Arg56Profs*156            | LP  | PVS1         | -    | -  | 0 |             |
| P37 | <i>LRBA</i>     | c.646-1G>A                               | VUS | PM2          | -    | -  | 0 |             |
| P38 | <i>JAK3</i>     | c.2080G>T p.Glu694Ter                    | LP  | PVS1 PM2     | 32   | -  | 0 |             |
| P39 | <i>IL2RG</i>    | c.437T>A p.Leu146Gln                     | VUS | PM2 PP3      | 23.3 | PD | 0 |             |
| P40 | <i>PRKCD</i>    | c.1097G>A p.Gly366Glu                    | VUS | PM2 BP4      | 22.9 | PD | 0 |             |
| P41 | <i>RAG2</i>     | c.623T>A p.Val208Asp                     | VUS | PM3 BP3      | 27   | PD | 0 |             |
| P42 | <i>CTLA4</i>    | c.118G>A p.Val40Met                      | LP  | PM2 BP4 PP5  | 24.3 | PD | 0 |             |
| P43 | <i>JAK1</i>     | c.2485A>G p.Asn829Asp                    | VUS | PM2 BP4      | 23.7 | PD | 0 |             |
| P44 | <i>RAG1</i>     | c.1767C>G p.Tyr589Ter                    | LP  | PVS1 PM2     | 32   | -  | 0 | 0.000297619 |
| P45 | <i>PRKCD</i>    | c.1097G>A p.Gly366Glu                    | VUS | PM2 BP4      | 22.9 | PD | 0 |             |
| P46 | <i>CYBB</i>     | c.770G>A p.Cys257Tyr                     | VUS | PM2 PP3      | 23.5 | PD |   |             |
| P47 | <i>CHUK</i>     | c.499G>A p.Gly167Arg                     | VUS | PM2 PP3      | 28   | PD | 0 |             |
| P48 | <i>CHUK</i>     | c.499G>A p.Gly167Arg                     | VUS | PM2 PP3      | 28   | PD | 0 |             |
| P49 | <i>RAG1</i>     | c.742C>T p.Gln248Ter                     | LP  | PVS1 PM2     | 32   | -  | 0 |             |
| P50 | <i>CD40L</i>    | c.15C>A p.Tyr5Ter                        | P   | PP5 PVS1 PM2 | 32   | -  | 0 |             |
| P51 | <i>UNC13D</i>   | c.2346_2349delGGAG<br>p.Arg782SerfsTer12 | P   | PP5 PVS1 PM2 | -    | -  | 0 | 0.000646831 |
| P52 | <i>IGGL1</i>    | c.425C>T p.Pro142Leu                     | VUS | PM2 BP4      | 15.4 | PD | 0 |             |
| P53 | <i>ELANE</i>    | c.703delG<br>p.Val235TrpfsTer5           | VUS | PM2          | -    | -  | 0 |             |

|            |                |                                   |      |              |      |    |   |             |
|------------|----------------|-----------------------------------|------|--------------|------|----|---|-------------|
| <b>P54</b> | <i>HCK</i>     | c.135_136delinsTG<br>p.Pro46Ala   | VUS  | PM2          | -    | -  | 0 |             |
| <b>P55</b> | <i>CYBA</i>    | c.385G>A p.Glu129Lys              | VUS  | PM2 PP3      | 26.1 | PD | 0 |             |
| <b>P56</b> | <i>SLC7A7</i>  | c.1417C>T p.Arg473Ter             | VUS  | PM2          | 31   | -  | 0 |             |
| <b>P57</b> | <i>NCF2</i>    | c.196C>T p.Arg66Ter               | P    | PP5 PVS1 PM2 | 54   | -  | 0 |             |
| <b>P58</b> | <i>DCLRE1C</i> | c.1633delT<br>p.Glu545AsnfsTer    | LP   | PVS1 PM2     | -    | -  | 0 |             |
| <b>P59</b> | <i>RAG2</i>    | c.712delC<br>p.Val238LeufsTer10   | LP   | PVS1 PM2     | -    | -  | 0 | 0.0003541   |
| <b>P60</b> | <i>IL12RB1</i> | c.523C>T p.Arg175Trp              | VUS  | PM2 PP3      | 22.5 | PD | 0 |             |
| <b>P61</b> | <i>CD40L</i>   | c.15C>A p.Tyr5Ter                 | P    | PP5 PVS1 PM2 | 32   | -  | 0 |             |
| <b>P62</b> | <i>ADA2</i>    | c.1072G>A p.Gly358Arg             | VUS  | PM2 PP3      | 25.2 | PD | 0 |             |
| <b>P63</b> | <i>IL12RB1</i> | c.1456C>T p.Arg486Ter             | P    | PP5 PVS1 PM2 | 33   | -  | 0 |             |
| <b>P64</b> | <i>CHUK</i>    | c.499G>A p.Gly167Arg              | P    | PP5 PVS1 PM2 | 32   | -  | 0 |             |
| <b>P65</b> | <i>CYBA</i>    | c.371C>T p.Ala124Val              | VUS  | PM2 PP3      | 24.1 | PD | 0 |             |
| <b>P66</b> | <i>GIMAP5</i>  | c.667C>T p.Leu223Phe              | P/LP | PP5 PM2      | 22.7 | PD | 0 |             |
| <b>P67</b> | <i>GIMAP5</i>  | c.667C>T p.Leu223Phe              | P/LP | PP5 PM2      | 22.7 | PD | 0 |             |
| <b>P68</b> | <i>CD79A</i>   | c.177dup<br>p.Asn60GlnfsTer20     | LP   | PVS1 PM2     | -    | -  | 0 |             |
| <b>P69</b> | <i>UNC13D</i>  | c.1082del<br>p.Tyr361SerfsTer43   | LP   | PVS1 PM2     | -    | -  | 0 |             |
| <b>P70</b> | <i>FAS</i>     | c.361C>T p.Arg121Trp              | P/LP | PP5 PM2      | 22.2 | D  | 0 |             |
| <b>P71</b> | <i>PRF1</i>    | c.1122G>A p.Trp374Ter             | LP   | PP5 PM2      | 47   | -  | 0 | 0.001022495 |
| <b>P72</b> | <i>DOCK8</i>   | c.5831C>T p.Pro1944Leu            | VUS  | PM2 PP3      | 32   | PD | 0 |             |
| <b>P73</b> | <i>DOCK8</i>   | c.5831C>T p.Pro1944Leu            | VUS  | PM2 PP3      | 32   | PD | 0 |             |
| <b>P74</b> | <i>CTLA4</i>   | c.151C>T p.Arg51Ter               | P/LP | PP5 PVS1 PM2 | 34   | -  | 0 |             |
| <b>P75</b> | <i>HAX1</i>    | c.130_131insA p.Trp44Ter          | P    | PP5 PVS1 PM2 | -    | -  | 0 | 0.000646831 |
| <b>P76</b> | <i>PIK3CG</i>  | c.2159A>G p.Tyr720Cys             | VUS  | PM2 PP3      | 29.6 | PD | 0 |             |
| <b>P77</b> | <i>MALTI</i>   | c.1133T>G p.Phe378Cys             | VUS  | PM2 PP3 BP1  | 28.7 | PD | 0 |             |
| <b>P78</b> | <i>MAGT1</i>   | c.628-4T>C                        | VUS  | PM2          | -    | -  | 0 |             |
| <b>P79</b> | <i>ACP5</i>    | c.772_790del<br>p.Ser258WTrpfs*39 | VUS  | PP5 PM2      | -    | -  | 0 |             |
| <b>P80</b> | <i>PGM3</i>    | c.821A>G p.Asn274Ser              | LP   | PP5 PM2 PP3  | 24.4 | PD | 0 |             |
| <b>P81</b> | <i>CD3G</i>    | c.80-1G>C                         | VUS  | PM2          | -    | -  | 0 |             |

|             |                |                        |      |              |      |    |   |             |
|-------------|----------------|------------------------|------|--------------|------|----|---|-------------|
| <b>P82</b>  | <i>ELANE</i>   | c.367-8C>A             | VUS  | PP5 PM2      | -    | -  | 0 |             |
| <b>P83</b>  | <i>CYBA</i>    | c.70G>Ap.Gly24Arg      | P    | PP5 PM2 PP3  | 25   | PD | 0 |             |
|             |                | c.373G>A p.Ala125Thr   | P    | PP5 PM2      | 24.6 | D  | 0 |             |
| <b>P84</b>  | <i>ADA2</i>    | c.319A>C p.Lys107Gln   | VUS  | PM2 PM3      | 24   | PD | 0 |             |
| <b>P85</b>  | <i>FAS</i>     | c.761T>A p.Val254Asp   | VUS  | PM1 PM2 PP3  | 23.5 | PD | 0 |             |
| <b>P86</b>  | <i>PNP</i>     | c.461+1G>A             | LP   | PVS1 PM2     | -    | -  | 0 |             |
| <b>P87</b>  | <i>RAB27A</i>  | c.514_518del           | LP   | PP5 PVS1 PM2 | -    | -  | 0 |             |
|             |                | p.Gln172AsnfsTer2      |      |              |      |    |   |             |
| <b>P88</b>  | <i>BACH2</i>   | c.745del               | LP   | PVS1 PM2     | -    | -  | 0 |             |
|             |                | p.Ser249ValfsTer93     |      |              |      |    |   |             |
| <b>P89</b>  | <i>RNF31</i>   | c.2846A>C p.Asn949Thr  | VUS  | PM2 BP4      | 24.1 | PD | 0 |             |
| <b>P90</b>  | <i>ACP5</i>    | c.772_790del           | LP   | PP5 PVS1 PM2 | -    | -  | 0 |             |
|             |                | Ser258Trpfs*39         |      |              |      |    |   |             |
| <b>P91</b>  | <i>PRF1</i>    | c.1122G>A p.Trp374Ter  | LP   | PP5 PVS1 PM2 | 47   | -  | 0 | 0.001022495 |
| <b>P92</b>  | <i>NCF1</i>    | Exon 5-6 Dup           | VUS  |              | -    | -  | 0 |             |
| <b>P93</b>  | <i>CHD7</i>    | c.1904A>T p.Asp635Val  | VUS  | PM2 BP4      | 27   | PD | 0 |             |
| <b>P94</b>  | <i>FCHO1</i>   | c.2183A>C p.Asn728Thr  | VUS  | PM2 BP4      | 23.1 | PD | 0 |             |
| <b>P95</b>  | <i>LRBA</i>    | c.2836_2839del         | P    | PP5 PVS1 PM2 | -    | -  | 0 |             |
|             |                | p.Glu946Ter            |      |              |      |    |   |             |
| <b>P96</b>  | <i>TBK1</i>    | c.1055T>C p.Leu352Pro  | VUS  | PM2 BP4      | 26.2 | PD | 0 |             |
| <b>P97</b>  | <i>IL7R</i>    | c.337G>T p.Glu113Ter   | LP   | PVS1 PM2     | 25.8 | -  | 0 |             |
| <b>P98</b>  | <i>LRBA</i>    | c.2836_2839del         | P    | PM5 PVS1     | -    | -  | 0 |             |
|             |                | p.Glu946Ter            |      | PM2          |      |    |   |             |
| <b>P99</b>  | <i>PRKDC</i>   | c.9182T>G p.Leu3061Arg | VUS  | PP5 PM2 BP4  | 26.4 | PD | 0 |             |
| <b>P100</b> | <i>RAG2</i>    | c.104G>C p.Gly35Ala    | LP   | PM2 PM5 PP2  | 25.3 | D  | 0 |             |
| <b>P101</b> | <i>PIK3CD</i>  | c.1573G>A p.Glu525Lys  | P/LP | PP5 PM2      | 24.8 | PD | 0 |             |
| <b>P102</b> | <i>FAS</i>     | c.340G>A p.Glu114Lys   | VUS  | PM2 PP3      | 25.8 | PD | 0 |             |
| <b>P103</b> | <i>STAT1</i>   | c.1192G>A p.Gly397Ser  | VUS  | PM2 PP3      | 32   | PD | 0 |             |
| <b>P104</b> | <i>IL6ST</i>   | c.2093C>A p.Ala698Glu  | VUS  | PM2 BP4      | 23.2 | PD | 0 |             |
| <b>P105</b> | <i>IL12RB1</i> | c.637C>T p.Arg213Trp   | P    | PP5 PM2      | 19.1 | D  | 0 |             |
| <b>P106</b> | <i>DOCK8</i>   | c.5766G>A p.Met1922Ile | VUS  | PM2 BP4      | 22.6 | PD | 0 |             |
| <b>P107</b> | <i>DOCK8</i>   | Exon 1-10 Deletion     | VUS  | PM2          | -    | -  | 0 |             |

|      |               |                                           |      |                 |      |    |   |          |
|------|---------------|-------------------------------------------|------|-----------------|------|----|---|----------|
| P108 | <i>SPINK5</i> | c.2658_2662dupGAGCA<br>p.Ile888ArgfsTer56 | VUS  | PM2             | -    | -  | 0 |          |
| P109 | <i>ADA</i>    | c.556G>A p.Glu186Lys                      | LP   | PM2 BP4         | 26   | D  | 0 |          |
| P110 | <i>RAG1</i>   | c.2095C>T p.Arg699Trp                     | P/LP | PP5 PM2         | 26   | D  | 0 |          |
| P111 | <i>PRF1</i>   | c.1267delC<br>p.Gln423LysfsX17            | LP   | PVS1 PM2        | -    | -  | 0 |          |
| P112 | <i>IL2RG</i>  | c.511G>T p.Glu171Ter                      | P    | PM5 PVS1<br>PM2 | 24.3 | -  | 0 |          |
| P113 | <i>CASP8</i>  | c.919C>T p.Arg307Trp                      | LP   | PM2 PM5 PP2     | 23.4 | D  | 0 |          |
| P114 | <i>DOCK8</i>  | c.5831C>T p.Pro1944Leu                    | LP   | PM2 PM5 PP2     | 27.1 | D  | 0 |          |
| P115 | <i>ADA</i>    | c.556G>A p.Glu186Lys                      | LP   | PM2 BP4         | 26   | D  | 0 |          |
| P116 | <i>RAG1</i>   | c.1307C>A p.Thr436Asn                     | VUS  | PM2 BP4         | 24.1 | D  | 0 |          |
| P117 | <i>RAG1</i>   | c.2322G>A p.Arg737His                     | P/LP | PP5 PM2         | 29.6 | D  | 0 | 0.000177 |
| P118 | <i>CYBA</i>   | c.70G>A p.Gly24Arg                        | VUS  | PP5 PM2 PP3     | 25   | PD | 0 |          |
| P119 | <i>PRF1</i>   | c.1385C>A p.Ser462Ter                     | P    | PM5 PVS1<br>PM2 | 26.6 | -  | 0 |          |
| P120 | <i>WAS</i>    | c.37C>T p.Arg13Ter                        | P    | PM5 PVS1<br>PM2 | 34   | -  | 0 |          |
| P121 | <i>WAS</i>    | c.91G>A p.Glu31Lys                        | P/LP | PP5 PM2         | 26   | PD | 0 |          |
| P122 | <i>PIK3CD</i> | c.1573G>A p.Glu525Lys                     | P/LP | PP5 PM2         | 24.8 | PD | 0 |          |

CADD: Combined Annotation Dependent Depletion ACMG: American College of Medical Genetics and Genomics  
VUS: Variant of Uncertain Significance \*Number of homozygous individuals in Gnomad 4.1 #Allele frequencies in Turkish Variome

**ACMG-based pathogenicity:** Our data analysis application “Seq, Genomize” uses ACMG 2015 criteria with minor modifications as explained below:

Evidence Codes (Autopathogenicity v2.x)

PVS1

A Null variant (nonsense, frameshift, canonical  $\pm 1$  or 2 splice sites, initiation codon, single or multiexon deletion) in a gene where the LOF is a known mechanism of a disease.

Null variant types:



Stop gained/Frameshift (Nonsense or Frameshift variant)

Splice acceptor/donor (GT-AG, 1,2 splice sites)

Start lost (Initiation Codon)

Deletion (Inframe or full gene deletion)

Loss of function is a mechanism of the disease if (either of the below is required):

At least 3 pathogenic LoF variants from the ClinVar (with a minimum of 1 star) need to be present

The LOEUF score of the transcript is smaller than 0.35 as suggested by GNOMAD

The transcript is biologically relevant if it is present in:

All RefSeq transcripts

Ensembl transcripts with expression in any of the 51 GTEx (v6) tissues (excluding expression data from two cell types)

The LoF variant in a particular exon is frequent in the general population if:

The 99th percentile of the allele frequency distribution of the previously reported LoF variants (GnomAD) in the exon is higher than the predefined threshold of 0.1%.

The Truncated/Altered region is critical for the protein function if:

For the nonsense/frameshift mutations: The altered region is the region between the variant position and the last base of the coding sequence (excluding the stop codon).

For the splice mutations: If the ORF is preserved, we consider the nearby (upstream for splice donor, downstream for splice acceptor) skipped exon as the altered region. Otherwise, it is the region between the variant position and the last base of the coding sequence.

For the deletion mutations: If the ORF is preserved, we consider only the skipped region of the protein. Otherwise, it is the region between the variant position and the last base of the coding sequence.

For the altered region to be critical for the protein, we require at least 3 pathogenic ClinVar variants with a minimum of 2 stars (multiple submitters) or higher.

Expected to undergo NMD (nonsense-mediated decay) if:

The variant is not present in the 3' most coding exon or the 3' most 50 bp of the penultimate coding exon.

The transcript has a multi-coding exon.

PS1

The same amino acid change as a previously established pathogenic variant regardless of the nucleotide change.

Evidence code strength is modified based on the Clinvar review status:

1-star: PS1 (Supporting)

2-star: PS1 (Moderate)

3-4 star: PS1 (Strong)

PM1

Located in a mutational hotspot and/or critical and well-established functional domain (e.g., an active site of an enzyme) without benign variation.

Detection of a mutational hotspot

A hotspot region is defined as the largest pathogenic variant dense region between two benign variations and meeting the following conditions:

Presence of a minimum of 5 pathogenic and 0 benign variants reported in the ClinVar.

Pathogenic variant count per base pair of the region is greater than the predefined threshold of 0.2.

Functional UniProt domain

To define a functional UniProt domain, the following rules are employed:

UniProt domains with ( 'chain', 'coiled-coil region', 'transit peptide', 'helix', 'turn', 'beta strand') categories are excluded.

Domains without benign variation in the ClinVar (with a minimum of 1 star).

At least 3 pathogenic variants in the ClinVar (with a minimum of 1 star).

PM2

Absent from controls (or at extremely low frequency if recessive) in the Exome Sequencing Project, the 1000 Genomes Project, or the Exome Aggregation Consortium databases.

Maximum allele frequency of the variant is less than the predefined threshold.

PM4

The protein length changes as a result of in-frame deletions/insertions in a non-repeat region or stop-loss variants.

PM5

A novel missense change at an amino acid residue where a different missense change was previously observed as a pathogenic variant.

Evidence code strength modified based on the Clinvar review status:

1-2 star: PM5 (Supporting)

3-4 star: PM5 (Moderate)

PP2

A missense variant in a gene that has a low rate of benign missense variation and in which missense variants are a common mechanism of disease.

This rule only applies to missense variants. The following thresholds are applied to determine if a missense variant is a common mechanism of disease:

Minimum missense pathogenic variant count in the transcript: 5

Missense/total pathogenic variant count ratio threshold: 70%

Missense pathogenic/benign count threshold: 0.65

PP3

Multiple lines of computational evidence support a deleterious effect on the gene or the gene product (conservation, evolutionary, splicing impact, etc.).

PP3 is assigned if one the following criteria is met (Ionnadis et al. 2016 (opens new window)):

The REVEL score is greater than 0.75

The REVEL score is greater than 0.5 and MetalR is damaging

The REVEL score is not available and MetalR is damaging

PP5

A reputable source recently reported the variant as pathogenic, but the evidence is not available to the laboratory to perform an independent evaluation.

Evidence code strength is modified based on the Clinvar review status:

1-star: PP5 (Supporting)

2-star: PP5 (Moderate)

3-star: PP5 (Strong)

4-star: PP5 (Very strong)

BA1

The allele frequency is >5% in the Exome Sequencing Project, the 1000 Genomes Project, or the Exome Aggregation Consortium databases.

Maximum allele frequency of the variant is greater than 5%

Variants on the BA1 exception list provided by Clingen are excluded. [Clingen Exception](#)

[List](#)(opens new window)

#### BS1

The allele frequency is greater than the expected frequency for the disorder.

Maximum allele frequency of the variant is less than the predefined BS1 threshold

#### BS2

Observed in a healthy adult individual for a recessive (homozygous), dominant (heterozygous), or X-linked (hemizygous) disorder, with full penetrance expected at an early age.

A variant was observed (at least 2 times) in the control cohort of the Gnomad (v2.1.1) database in a homozygous state.

#### BP1

A Missense variant in a gene for which primarily truncating variants are known to cause disease.

At least 5 pathogenic variants are reported in the ClinVar database.

All pathogenic variants in the ClinVar database are truncating.

#### BP3

In-frame deletions/insertions in a repetitive region without a known function.

BP3 is assigned if the variant is in a repetitive region and the repetitive region meets the following criteria.

Do not overlap with a functional UniProt domain.

Do not have a pathogenic variant reported in the ClinVar.

#### BP4

Multiple lines of computational evidence suggest no impact on the gene or the gene product (conservation, evolutionary, splicing impact, etc.).

BP4 is assigned if one the following criteria is met (Ionnadis et al. 2016 (opens new window)):

The REVEL score is less than 0.5

The REVEL score is less than 0.75 and MetalR is benign

The REVEL score is not available and MetalR is benign

BP6

A Reputable source recently reported the variant as benign, but the evidence is not available to the laboratory to perform an independent evaluation.

Evidence code strength is modified based on ClinVar review status:

1-2-star: BP6 (Supporting)

3-star: BP6 (Strong)

4-star: BP6 (Stand alone)

BP7

A synonymous (silent) variant for which splicing prediction algorithms predict no impact to the splice consensus sequence nor the creation of a new splice site AND the nucleotide is not highly conserved.

BP7 is assigned if the following criteria are met:

Cryptic splice site is not predicted (ADA and RF scores are less than 0.6)

Low conservation score (phylop100way score is less than 1.879)

Unimplemented Evidence Codes

The following evidence codes are unimplemented: PS2, PS3, PS4, PM3, PM6, PP1, PP4, BS3, BS4, BP2, BP5.

**Supplementary Table 2:** Detailed evaluation of possible disease-causing monoallelic variants

| Patient no | Gene         | Variant                        | CADD | ACMG criteria                       |                                                                                                       |              |       |                                                     |
|------------|--------------|--------------------------------|------|-------------------------------------|-------------------------------------------------------------------------------------------------------|--------------|-------|-----------------------------------------------------|
| <b>P42</b> | <i>CTLA4</i> | c.118G>A<br>p.Val40Met         | 24.3 | LP                                  | AIHA, enteropathy, reduced T and B cells                                                              | rs1553657378 | [2-5] | -                                                   |
| <b>P53</b> | <i>ELANE</i> | c.703delG<br>p.Val235TrpfsTer5 | -    | VUS                                 | Recurrent bacterial infections, severe congenital neutropenia                                         | Novel        | -     | Congenital neutropenia                              |
| <b>P70</b> | <i>FAS</i>   | c.361C>T<br>p.Arg121Trp        | 22.1 | Pathogenic/<br>Likely<br>Pathogenic | Splenomegaly, lymphadenopathy, ITP                                                                    | rs121913078  | [6]   | -                                                   |
| <b>P82</b> | <i>ELANE</i> | c.367-8C>A                     | -    | VUS                                 | Early onset IBD, oral aphthosis, recurrent gastrointestinal infections, severe congenital neutropenia | novel        | -     | Reduced/absence expression of ELANE by western blot |
| <b>P88</b> | <i>BACH2</i> | c.745del<br>p.Ser249ValfsTer93 | -    | Likely<br>Pathogenic                | IBD, pancreatitis, hypogammaglobulinemia                                                              | novel        | -     | Reduced/absence expression of BACH2 by western blot |
| <b>P96</b> | <i>TBK1</i>  | c.1055T>C<br>p.Leu352Pro       | 26.1 | VUS                                 | Enteroviral meningitis, recurrent sinopulmonary infections, failure to thrive                         | novel        | -     | Impaired immune response to TLR3-dependent viruses  |

|             |               |                          |      |            |                                                                                                                                                                 |             |         |                               |
|-------------|---------------|--------------------------|------|------------|-----------------------------------------------------------------------------------------------------------------------------------------------------------------|-------------|---------|-------------------------------|
|             |               |                          |      |            | lymphoproliferation, reduced switched memory B cells                                                                                                            |             |         |                               |
| <b>P102</b> | <i>FAS</i>    | c.340G>A<br>p.Glu114Lys  | 26.5 | VUS        | Missense                                                                                                                                                        | rs773565107 | -       | Aberrant lymphocyte apoptosis |
| <b>P103</b> | <i>STAT1</i>  | c.1192G>A<br>p.Gly397Ser | 28.9 | VUS        | Recurrent pulmonary infections, bronchiectasis, CMC, nail dystrophia, severe growth retardation, hypothyroidism, hypergammaglobulinemia, CD4+ T cel lymphopenia | novel       | -       |                               |
| <b>P104</b> | <i>IL6ST</i>  | c.2093C>A<br>p.Ala698Glu | 23.3 | VUS        | Recurrent pulmonary infections, bronchiectasis, severe eczema, hypogammaglobulinemia, elevated IgE, lymphopenia                                                 | rs745818447 | -       |                               |
| <b>P122</b> | <i>PIK3CD</i> | c.1573G>A<br>p.Glu525Lys | 29.6 | Pathogenic | EBV infection, lymphadenopathy, reduced IgA and IgG                                                                                                             | rs587777389 | [9, 10] | -                             |

CADD: Combined Annotation Dependent Depletion ACMG: American College of Medical Genetics and Genomics VUS: Variant of Uncertain Significance AIHA: Autoimmune hemolytic anemia HSM: Hepatosplenomegaly IBD: Inflammatory bowel disease ITP: Immune thrombocytopenic purpura DNT: Double negative T cells



**Supplementary Table 3.** Variants detected in all kindreds in the study

| Patients and kindreds | Age     | Gender | Gene   | Variant                                              | Characteristics                                                                                                                                                                                                              |
|-----------------------|---------|--------|--------|------------------------------------------------------|------------------------------------------------------------------------------------------------------------------------------------------------------------------------------------------------------------------------------|
| <b>K1 (P7-P8)</b>     | 2 - 1   | M - M  | RAG1   | c.2005G>A<br>p.Glu669Lys<br>c.1307C>A<br>p.Thr436Asn | P7: T- B- NK+ SCID, very low T and B cells                                                                                                                                                                                   |
|                       |         |        |        |                                                      | P8: T- B- NK+ SCID, very low T and B cells                                                                                                                                                                                   |
| <b>K2 (P9-P10)</b>    | 6- 4    | M- M   | CD70   | c.332C>T<br>p.Thr111Met                              | P9: Burkitt lymphoma, chronic diarrhea, recurrent pneumonia, EBV LAP, hypogammaglobulinemia, reduced memory B cells                                                                                                          |
|                       |         |        |        |                                                      | P10: Non-Hodgkin lymphoma, recurrent pneumonia, EBV LAP, hypogammaglobulinemia, reduced memory B cells                                                                                                                       |
| <b>K3 (P14-P15)</b>   | 1 - 1   | M - M  | RAG2   | c.105G>C<br>p.Gly35Ala                               | P14: T- B- NK+ SCID, very low T and B cells<br><br>P15: T- B- NK+ SCID, very low T and B cells                                                                                                                               |
| <b>K4 (P47-P48)</b>   | 8 - 4   | F - F  | CHUK   | c.499G>A<br>p.Gly167Arg                              | P47: Recurrent bacterial, viral, fungal infections, chronic diarrhea, failure to thrive, hepatic fibrosis, absent secondary lymphoid tissues, hypogammaglobulinemia, reduced switched memory B cells                         |
|                       |         |        |        |                                                      | P48: Recurrent bacterial, viral, fungal infections, chronic diarrhea, failure to thrive, hepatic fibrosis, absent secondary lymphoid tissues, hypogammaglobulinemia, reduced switched memory B cells                         |
| <b>K5 (P66-P67)</b>   | 17 - 12 | M - F  | GIMAP5 | c.667C>T<br>p.Leu223Phe                              | P66: Hodgkin lymphoma, food allergy, family history, reduced IgG, low B cells, slightly reduced T cell activation<br><br>P67: Hodgkin lymphoma, family history, reduced IgG, low B cells, slightly reduced T cell activation |
| <b>K6 (P72-P73)</b>   | 4 - 6   | M - F  | DOCK8  | c.5831C>T<br>p.Pro1944Leu                            | P72: Failure to thrive, HPV infection, verrucous lesion, EBV +, CD4 T cell lymphopenia, elevated IgE                                                                                                                         |
|                       |         |        |        |                                                      | P73: Failure to thrive, HPV infection, verrucous lesion, CD4 T cell lymphopenia, elevated IgE                                                                                                                                |

K: Kindred SCID: Severe combined immunodeficiency LAP: Lymphadenopathy

## References

1. Kars ME, Basak AN, Onat OE, Bilguvar K, Choi J, Itan Y, et al. The genetic structure of the Turkish population reveals high levels of variation and admixture. *Proc Natl Acad Sci U S A*. 2021;118(36).
2. Egg D, Rump IC, Mitsuiki N, Rojas-Restrepo J, Maccari ME, Schwab C, et al. Therapeutic options for CTLA-4 insufficiency. *J Allergy Clin Immunol*. 2022;149(2):736-46.
3. Hoshino A, Tanita K, Kanda K, Imadome KI, Shikama Y, Yasumi T, et al. High frequencies of asymptomatic Epstein-Barr virus viremia in affected and unaffected individuals with CTLA4 mutations. *Clin Immunol*. 2018;195:45-8.
4. Rae W, Ward D, Mattocks C, Pengelly RJ, Eren E, Patel SV, et al. Clinical efficacy of a next-generation sequencing gene panel for primary immunodeficiency diagnostics. *Clin Genet*. 2018;93(3):647-55.
5. Schwab C, Gabrysch A, Olbrich P, Patino V, Warnatz K, Wolff D, et al. Phenotype, penetrance, and treatment of 133 cytotoxic T-lymphocyte antigen 4-insufficient subjects. *J Allergy Clin Immunol*. 2018;142(6):1932-46.
6. Bettinardi A, Brugnoli D, Quiros-Roldan E, Malagoli A, La Grutta S, Corra A, Notarangelo LD. Missense mutations in the Fas gene resulting in autoimmune lymphoproliferative syndrome: a molecular and immunological analysis. *Blood*. 1997;89(3):902-9.
7. Kuehn HS, Ouyang W, Lo B, Deenick EK, Niemela JE, Avery DT, et al. Immune dysregulation in human subjects with heterozygous germline mutations in CTLA4. *Science*. 2014;345(6204):1623-7.
8. Verloes A. Updated diagnostic criteria for CHARGE syndrome: a proposal. *Am J Med Genet A*. 2005;133A(3):306-8.
9. Coulter TI, Chandra A, Bacon CM, Babar J, Curtis J, Sreaton N, et al. Clinical spectrum and features of activated phosphoinositide 3-kinase delta syndrome: A large patient cohort study. *J Allergy Clin Immunol*. 2017;139(2):597-606 e4.
10. Lucas CL, Kuehn HS, Zhao F, Niemela JE, Deenick EK, Palendira U, et al. Dominant-activating germline mutations in the gene encoding the PI(3)K catalytic subunit p110delta result in T cell senescence and human immunodeficiency. *Nat Immunol*. 2014;15(1):88-97.

Supplementary Figure. Filtering strategy of WES data and technical outcome of the WES data.

A. Filtering strategy. B. Total number of reads in each sample. C. Average read depth in each sample. D. Coverage of target regions in each sample (20X and 50X).

**A**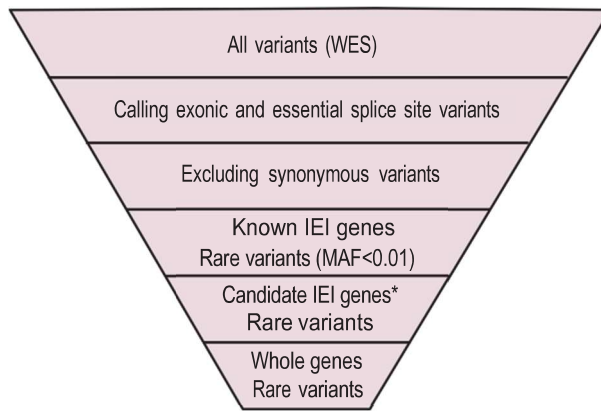**B**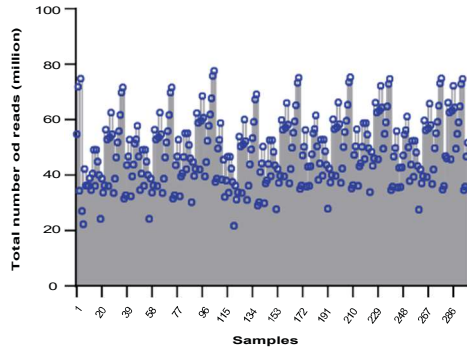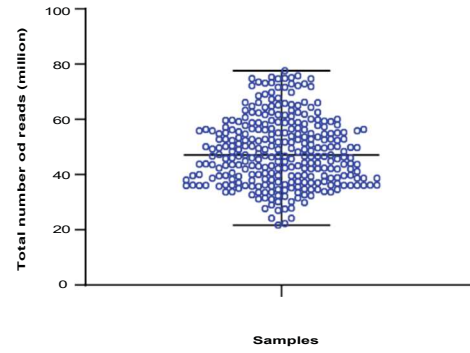**C**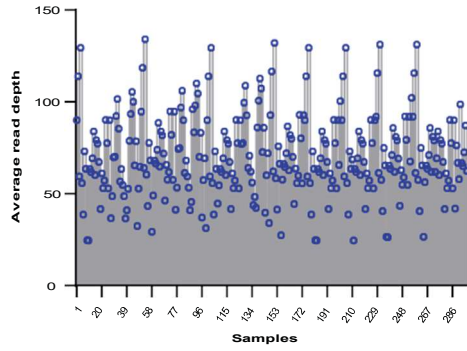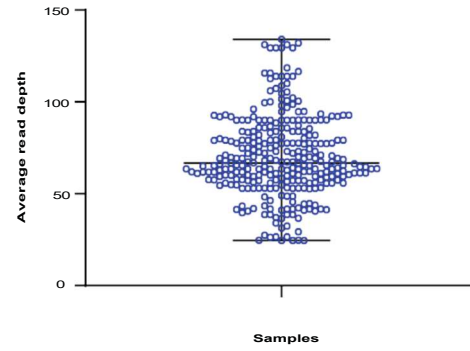**D**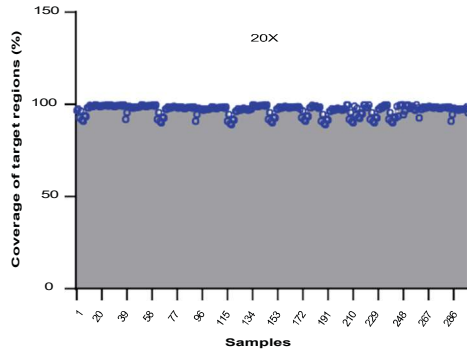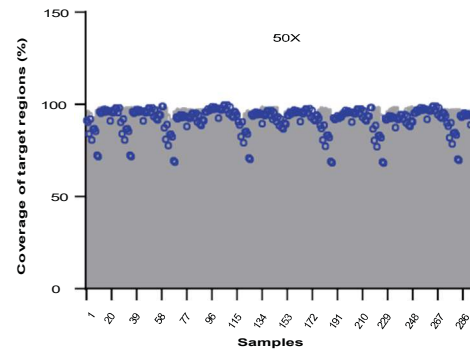

Supplement: 10875_2024_1759_MOESM1_ESM.pdf [file 10875_2024_1759_MOESM1_ESM.pdf]
